# Supplementary material for: Adjuvant IL-7 or IL-15 overcomes immunodominance and improves survival of the CD8+ memory cell pool
Source: JCI journal article supplement (doi:10.1172/jci23134), 2005-04-07
Supplement: sd1 [file 1]

# Supplemental Data: Figure 1

**Supplemental Data, figure 1: RhIL15 Therapy Increases the Frequency of CD4+CD122+ Splenocytes.** Animals were treated with cytokines as described. On D28, animals were humanely euthanized and splenocytes were evaluated for CD122+ expression. Dot plots demonstrate rhIL15 induced increase in the frequency of CD8+CD122+ cells as shown in figure 2, and an increase in CD8-CD122+ cells which represent CD4 cells.

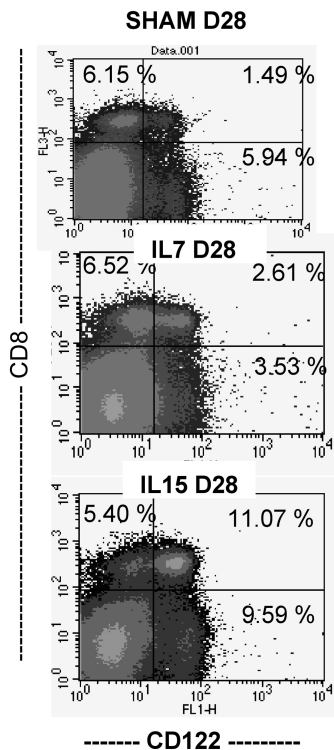

# Supplemental Data: Figure 2

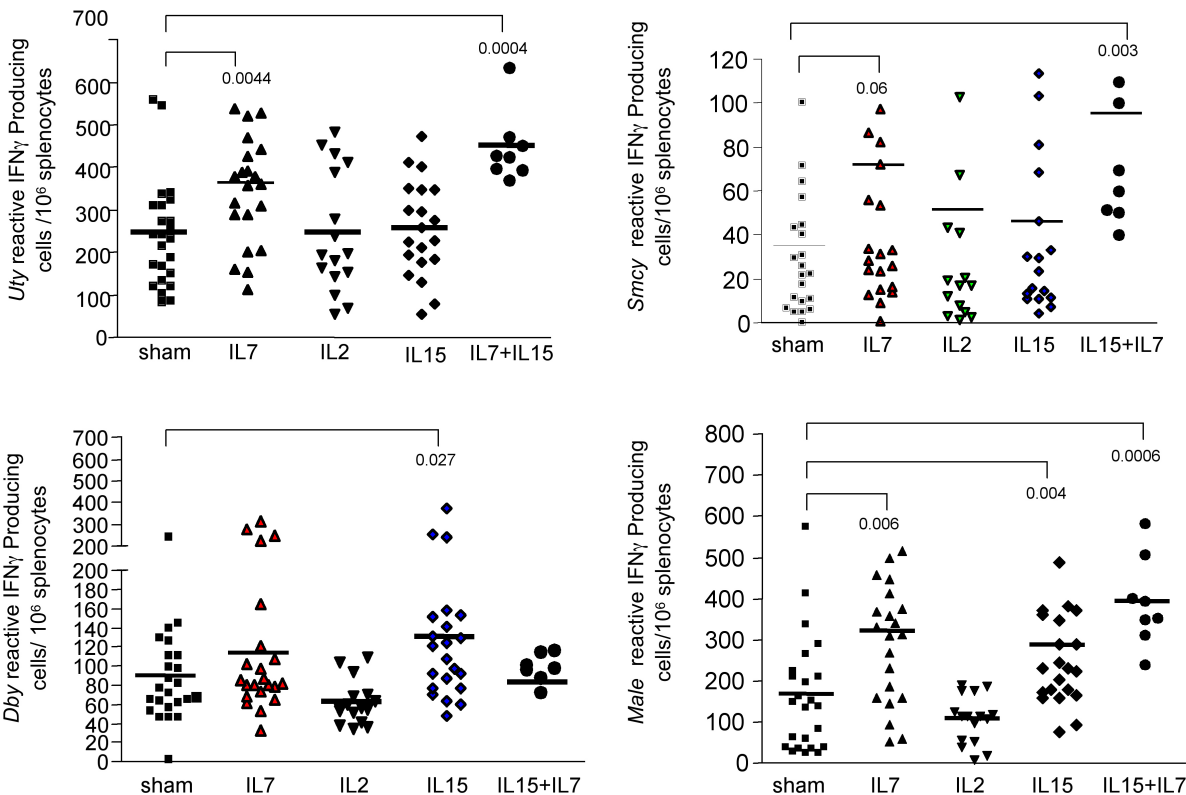

**Supplemental Data, figure 2: Cytokine Induced Effects on Antigen Specific Pools are Diminished on D56.** Animals were immunized on D0, D14, D28 and D42 and treated with cytokines as described in methods. Elispot analysis was undertaken as described in figures 4 and 5. Significant differences (unpaired t-test) between sham and cytokine treated animals are shown. Results are pooled from three separate experiments for sham (n=24), rhIL7 (n=24), rhIL15 (n=20) and two experiments for rhIL7+rhIL15 (n=8).
